# Supplementary material for: A systematic review using thematic analysis exploring cultural competence in pharmacy education: What is done? How is it done? What does it mean?
Source: Research Square preprint supplement (doi:10.21203/rs.3.rs-2382602/v1), 2023-01-16
Supplement: Supplementary file 1 [file 59d3ce6b2dc42cf6bec4a596.docx]

**Supplementary material 1**

**Data extraction form for studies on culture competence education**

| **Study information** | |
| --- | --- |
| 1. Author: | 1. Year: |
| 1. Study title: |  |
| 1. Study objectives |  |
| 1. Geographical location: |  |
| 1. Context of the study: | *Guidelines or regulations surrounding cultural competences in the country where the study was conducted* |
| **Culture competence training description** | |
| 1. Culture competence components | *Culture competence concepts that were included in the course/training* |
| 1. Year level | *Programme year level of pharmacy students included in the programme* |
| 1. Number of participants in the course |  |
| 1. Participant characteristics |  |
| 1. Compulsory or elective course? |  |
| 1. Standalone course or integrated with other topics | *Whether students received the culture competence training as a standalone programme or whether it was integrated with other* *topics;* *e.g. global health or interprofessional education* |
| 1. Mode of delivery | *How the training was delivered; lectures, workshops, experience.... etc* |
| 1. Length of culture competence training |  |
| **Culture competence assessment** | |
| 1. Data collection method |  |
| 1. Data analysis method |  |
| 1. Number of participants included in the assessment |  |
| 1. Characteristics of participants included in the assessment |  |
| 1. Culture competence capabilities assessed |  |
| 1. Pre-training assessment results |  |
| 1. Post-training assessment results |  |
